# Supplementary material
Source: PubMed Central journal article supplement (PMC4320266)
Supplement: mmc1.pdf [file mmc1.pdf]

The American Journal of Human Genetics

Supplemental Data

**TFIIH Subunit Alterations Causing Xeroderma Pigmentosum  
and Trichothiodystrophy Specifically Disturb Several Steps  
during Transcription**

Amita Singh, Emanuel Compe, Nicolas Le May, and Jean-Marc Egly

Figure S1

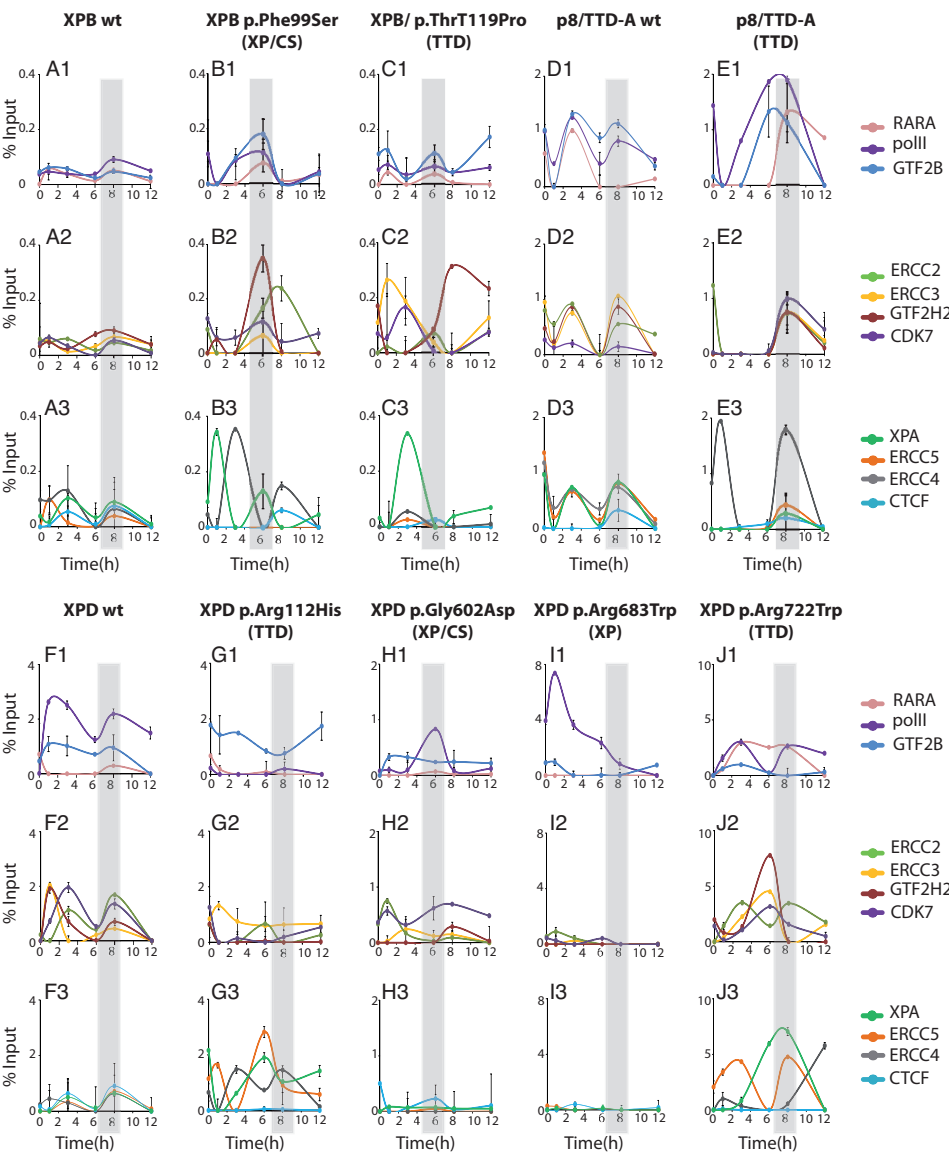

# Figure S2

DNA break at terminator region

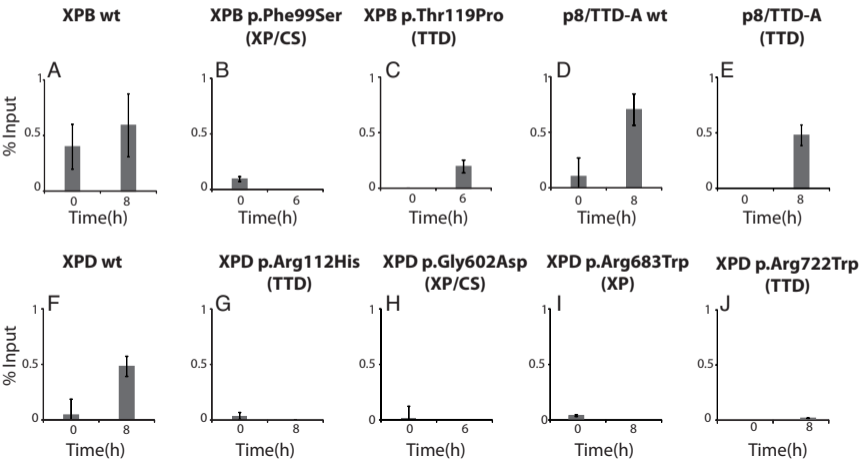

Figure S3

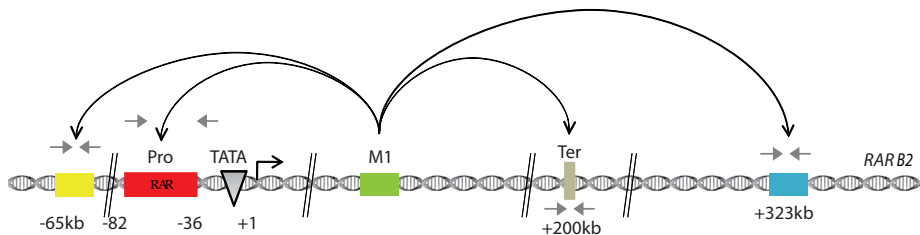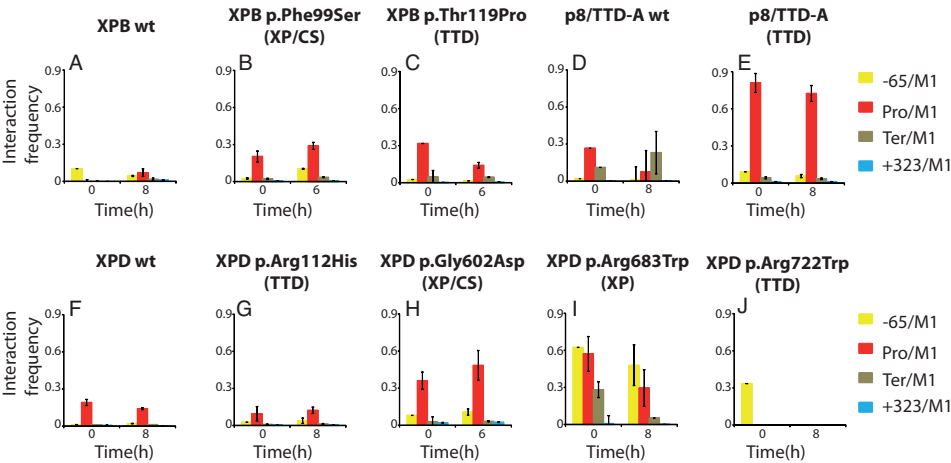

## Supplemental Figure Legends

### **Figure S1. Transcriptional machinery and NER factors recruitment on the *RARB2* terminator are disturbed in cells bearing mutations in genes encoding TFIIH subunits**

ChIP monitoring the t-RA-dependent recruitment of RARA, pol II, GTF2B (panels A1-J1), ERCC3, ERCC2, GTF2H2, CDK7 subunits of TFIIH (panels A2-J2) and XPA, ERCC5, ERCC4, CTCF (panels A3-J3) on the *RARB2* terminator; Each series of ChIP is representative of at least two independent experiments. Values are expressed as percentage of the input. Error bars represent standard deviation.

### **Figure S2. Mutations in genes encoding TFIIH subunits dysregulated DNA breaks on the *RARB2* terminator**

(A-J) Detection of DNA breaks at *RARB2* terminator at 0 and either at 6 or 8 hours post t-RA treatment depending on the formation of the transcriptional machinery corresponding to RNA expression peak (see Figure 2 shadowed areas). Each series of BioChIP is representative of three independent experiments and values are expressed as percentage of the input. Error bars represent standard deviation.

### **Figure S3. 3C Controls for TFIIH mutated cells**

(Upper panel) Schematic representation of the quantitative chromatin conformation capture (q3C). One probe was designed at the *RARB2* intronic region (M1) to investigate the associations between the different elements including upstream (-65 kb), promoter (Pro), terminator (Ter), and downstream (+323 kb) regions as indicated by the black arrows.

(Lower panels, A-J) q3C assays were performed using crosslinked and HindIII-digested chromatin from all the cells as indicated at 0 and either at 6 or 8 hours post t-RA treatment depending on the formation of the transcriptional machinery corresponding to RNA expression peak (see Figure 2 shadowed areas). The bar chart (y axis) shows the enrichment of PCR product (%) normalized to the enrichment within human *ERCC3* (=100%). Each PCR was performed at least three times. Signals were normalized to the total amount of DNA used, estimated with an amplicon located within a HindIII fragment in *RARB2*. Error bars represent standard deviation.

**Table S1. List of the primers used in the study.**

| Primers                 | Forward                               | Reverse                    |
|-------------------------|---------------------------------------|----------------------------|
| <b>mRNA</b>             |                                       |                            |
| <i>GAPDH</i>            | AGCTCACTGGCATGGCCTTC                  | ACGCCTGCTTCACCACCTTC       |
| <i>RARβ2</i>            | CCAGCAAGCCTCCATGTTC                   | TACACGCTCTGCACCTTTAGC      |
| <b>ChIP</b>             |                                       |                            |
| <i>RARβ2</i> Promoter   | TGGTGATGTCAGACTAGTTGGGTC              | GCTCACTTCCTACTACTTCTGTAC   |
| <i>RARβ2</i> Terminator | TGTTTGTGCTCTTTGGGCACT                 | CGGTCCGGGCTAGGAAACAAGTAAA  |
| <b>3C primers</b>       |                                       |                            |
| -65                     | CCTGGCAATTGAAACATGAAAGT               |                            |
| Pro                     | TCCAAAGATGCCTATTAAGTTGTAAGAG          |                            |
| M1                      | AGCAGCAAAATGCAGGCTTTA                 | TGACACCAGTGAAAAGGAAGCA     |
| Ter                     | AAGATGCAGTTTGAGAGCATC                 | CTGGGCAACATGAAATAAAAAGATG  |
| 323                     | CCAAACAATTTTCTTCATGGTCATT             |                            |
| <i>RARβ2</i> promoter   | CAGACTAGTTGGGTCATTTGAAGGT             | TTGAATTGCCTAATATATGCGAGTGA |
| <i>XPB</i>              | CGGTGAGGTGAGTTTGTGGAAT                | AGGATCTCTGTTTAATGGAAAAGCTT |
| <b>3C Probes</b>        |                                       |                            |
| Ter probe               | 6[FAM]TTGCTCTTTCTGATGCTCTCAAA[TAM]    |                            |
| M1 probe                | 6[FAM]CAGTACAGTCAAGGTGGCCCGTCT[TAM]   |                            |
| <i>RARβ2</i> probe      | 6[FAM]AGCCCGGGTAGGGTTCACCGAAAG[TAM]   |                            |
| <i>XPB</i> probe        | 6[FAM]AAGGATGAAGGCGTGATCCGACTCTG[TAM] |                            |
